# Supplementary material
Source: PubMed Central journal article supplement (PMC10482193)
Supplement: NIHMS1922495-supplement-jp-2020-059948_SI.pdf [file NIHMS1922495-supplement-jp-2020-059948_SI.pdf]

**Supporting information for:**  
**Critical Sequence Hot-spots for Binding of nCOV-2019 to ACE2 as Evaluated**  
**by Molecular Simulations**

Mahdi Ghorbani<sup>1,3</sup>, Bernard Brooks<sup>3</sup>, Jeffery Klauda<sup>1,2</sup>

<sup>1</sup>Department of Chemical and Biomolecular Engineering, <sup>2</sup>Biophysics Graduate Program,  
University of Maryland, College Park, MD 20742, USA

<sup>3</sup>Laboratory of Computational Biology, National, Heart, Lung and Blood Institute, National  
Institutes of Health, Bethesda, Maryland 20824, USA

\*Corresponding Author: [jbklauda@umd.edu](mailto:jbklauda@umd.edu)

**Table S1.** Residues investigated here and their corresponding location in RBD of nCOV-2019.

| residue     | Location   |
|-------------|------------|
| <b>K417</b> | $\alpha_3$ |
| <b>N439</b> | $\alpha_4$ |
| <b>G446</b> | $L_1$      |
| <b>G447</b> | $L_1$      |
| <b>Y449</b> | $L_1$      |
| <b>Y453</b> | $\beta_5$  |
| <b>L455</b> | $\beta_5$  |
| <b>F456</b> | $L_2$      |
| <b>Y473</b> | $\beta_6$  |
| <b>A475</b> | $\beta_6$  |
| <b>G476</b> | $L_3$      |
| <b>T478</b> | $L_3$      |
| <b>V483</b> | $L_3$      |
| <b>E484</b> | $L_3$      |
| <b>F486</b> | $L_3$      |
| <b>N487</b> | $L_3$      |
| <b>Y489</b> | $\beta_6$  |
| <b>Q493</b> | $\beta_5$  |
| <b>S494</b> | $\beta_5$  |
| <b>G496</b> | $L_4$      |
| <b>Q498</b> | $L_4$      |
| <b>T500</b> | $L_4$      |
| <b>N501</b> | $L_4$      |
| <b>G502</b> | $L_4$      |
| <b>Y505</b> | $\alpha_5$ |

**Table S2.** Binding free energy decomposition in  $\frac{kcal}{mol}$  for 2019-nCoV, SARS-COV and mutants.

|                   | <b>vdw</b>     | <b>Electro</b> | <b>Polar solv</b> | <b>SASA</b>   | <b>total</b>  |
|-------------------|----------------|----------------|-------------------|---------------|---------------|
| <b>SARS-COV</b>   | -70.07 ± 1.22  | -600.14 ± 7.65 | 659.61 ± 8.98     | -8.39 ± 0.15  | -18.79 ± 1.53 |
| <b>SARS-D480A</b> | -88.30 ± 0.69  | -897.14 ± 3.8  | 972.07 ± 3.90     | -10.14 ± 0.07 | -23.46 ± 3.07 |
| <b>nCOV-2019</b>  | -89.93 ± 0.46  | -746.59 ± 2.66 | 797.3 ± 3.12      | -10.58 ± 0.05 | -50.22 ± 1.93 |
| <b>K417A</b>      | -88.23 ± 0.58  | -415.67 ± 5.07 | 484.87 ± 4.89     | -10.29 ± 0.09 | -29.56 ± 2.95 |
| <b>N439K</b>      | -95.4 ± 0.63   | -989.84 ± 5.57 | 1047.70 ± 5.08    | -10.86 ± 0.06 | -48.27 ± 3.07 |
| <b>G446A</b>      | -91.9 ± 0.5    | -730.12 ± 3.68 | 774.7 ± 4.18      | -10.6 ± 0.08  | -57.79 ± 2.92 |
| <b>G447A</b>      | -93.95 ± 0.75  | -756.61 ± 4.63 | 803.48 ± 5.02     | -11.08 ± 0.09 | -58.37 ± 2.32 |
| <b>Y449A</b>      | -97.98 ± 0.56  | -717.67 ± 2.71 | 774.49 ± 3.50     | -10.80 ± 0.05 | -51.91 ± 2.33 |
| <b>Y453A</b>      | -92.3 ± 0.65   | -712.76 ± 3.61 | 765.63 ± 3.98     | -10.96 ± 0.07 | -49.98 ± 2.92 |
| <b>L455A</b>      | -84.96 ± 0.56  | -734.72 ± 4.44 | 795.41 ± 4.06     | -10.63 ± 0.08 | -33.47 ± 2.93 |
| <b>F456A</b>      | -95.43 ± 0.57  | -770.12 ± 3.38 | 832.56 ± 4.14     | -11.59 ± 0.07 | -44.84 ± 3.38 |
| <b>Y473A</b>      | -90.48 ± 0.54  | -725.17 ± 4.27 | 779.23 ± 4.16     | -10.61 ± 0.06 | -47.23 ± 2.59 |
| <b>A475V</b>      | -93.12 ± 0.49  | -712.12 ± 4.59 | 769.23 ± 4.71     | -10.68 ± 0.08 | -46.07 ± 4.11 |
| <b>G476A</b>      | -92.84 ± 0.57  | -746.46 ± 4.92 | 796.97 ± 4.84     | -10.99 ± 0.08 | -53.57 ± 2.58 |
| <b>G476S</b>      | -92.25 ± 0.64  | -712.08 ± 4.10 | 767.40 ± 4.32     | -10.77 ± 0.08 | -47.38 ± 2.86 |
| <b>T478I</b>      | -88.95 ± 0.69  | -753.93 ± 4.00 | 797.03 ± 4.01     | -10.33 ± 0.08 | -56.06 ± 2.83 |
| <b>V483A</b>      | -90.74 ± 0.60  | -737.48 ± 3.94 | 789.22 ± 3.74     | -10.76 ± 0.07 | -49.55 ± 3.17 |
| <b>V483F</b>      | -87.23 ± 0.6   | -738.08 ± 4.73 | 782.82 ± 4.04     | -10.59 ± 0.09 | -53.70 ± 3.35 |
| <b>E484A</b>      | -95.7 ± 0.62   | -941.2 ± 3.95  | 1002.21 ± 4.92    | -11.15 ± 0.08 | -46.67 ± 2.89 |
| <b>F486A</b>      | -90.07 ± 0.66  | -724.64 ± 4.39 | 779.73 ± 5.01     | -10.68 ± 0.09 | -45.23 ± 3.66 |
| <b>N487A</b>      | -102.23 ± 0.72 | -724.44 ± 3.69 | 791.41 ± 4.3      | -11.37 ± 0.08 | -46.33 ± 2.73 |
| <b>Y489A</b>      | -103.85 ± 0.66 | -773.72 ± 3.15 | 827.52 ± 4.36     | -11.59 ± 0.05 | -61.78 ± 2.59 |
| <b>Q493A</b>      | -84.68 ± 0.68  | -713.28 ± 3.67 | 758.56 ± 3.63     | -9.87 ± 0.07  | -48.19 ± 2.64 |
| <b>S494A</b>      | -94.98 ± 0.66  | -736.93 ± 4.05 | 793.94 ± 3.84     | -11.02 ± 0.07 | -49.09 ± 3.26 |
| <b>S494P</b>      | -89.39 ± 0.60  | -737.54 ± 5.25 | 789.35 ± 5.74     | -10.67 ± 0.08 | -47.90 ± 2.59 |
| <b>G496A</b>      | -93.17 ± 0.55  | -728.93 ± 4.39 | 784.81 ± 4.93     | -10.89 ± 0.07 | -48.38 ± 2.67 |
| <b>Q498A</b>      | -90.48 ± 0.61  | -756.18 ± 4.6  | 812.84 ± 4.75     | -11.02 ± 0.09 | -45.4 ± 2.74  |
| <b>T500A</b>      | -93.64 ± 0.62  | -704.44 ± 4.1  | 769.65 ± 4.73     | -10.86 ± 0.08 | -39.27 ± 3.18 |
| <b>N501A</b>      | -88.59 ± 0.66  | -730.53 ± 3.63 | 788.41 ± 4.3      | -10.75 ± 0.08 | -40.36 ± 3.3  |
| <b>G502A</b>      | -87.61 ± 0.63  | -706.13 ± 4.56 | 780.08 ± 4.61     | -10.51 ± 0.07 | -24.31 ± 2.98 |
| <b>Y505A</b>      | -91.35 ± 0.7   | -746.12 ± 4.31 | 802.16 ± 5.29     | -10.78 ± 0.08 | -46.49 ± 2.92 |

**Table S3.** Details of H-bonds for mutants of nCOV-2019.

| mutant       | #            | RBD    | ACE2   | Occupancy % | mutant       | #            | RBD    | ACE2   | Occupancy % |    |
|--------------|--------------|--------|--------|-------------|--------------|--------------|--------|--------|-------------|----|
| <b>K417A</b> | 1            | GLY502 | LYS353 | 87          | <b>L455A</b> | 1            | TYR449 | ASP38  | 93          |    |
|              | 2            | ASN487 | TYR83  | 82          |              | 2            | GLY502 | LYS353 | 88          |    |
|              | 3            | GLN493 | GLU35  | 77          |              | 3            | ASN487 | TYR83  | 77          |    |
|              | 4            | THR500 | ASP355 | 73          |              | 4            | LYS417 | ASP30  | 71          |    |
|              | 5            | TYR449 | ASP38  | 53          |              | 5            | TYR505 | GLU37  | 60          |    |
| <b>N439K</b> | 1            | GLY502 | LYS353 | 85          |              | 6            | GLN493 | GLU35  | 58          |    |
|              | 2            | GLN493 | GLU35  | 82          |              | 7            | GLN498 | LYS353 | 55          |    |
|              | 3            | ASN487 | TYR83  | 67          |              | 8            | GLY496 | LYS353 | 40          |    |
|              | 4            | GLN498 | ASP38  | 66          | <b>F456A</b> | 1            | GLY502 | LYS353 | 83          |    |
|              | 5            | THR500 | ASP355 | 60          |              | 2            | ASN487 | TYR83  | 79          |    |
|              | 6            | LYS417 | ASP30  | 51          |              | 3            | GLN498 | LYS353 | 75          |    |
|              | 7            | GLN498 | LYS353 | 42          |              | 4            | LYS417 | ASP30  | 74          |    |
| <b>G446A</b> | 1            | TYR449 | ASP38  | 94          |              | 5            | TYR505 | GLU37  | 70          |    |
|              | 2            | GLY502 | LYS353 | 90          |              | 6            | THR500 | ASP355 | 69          |    |
|              | 3            | GLN498 | ASP38  | 88          |              | 7            | GLN493 | GLU35  | 63          |    |
|              | 4            | TYR83  | ASN487 | 79          | <b>Y473A</b> | 1            | GLY502 | LYS353 | 88          |    |
|              | 5            | GLN493 | GLU35  | 76          |              | 2            | ASN487 | TYR83  | 82          |    |
|              | 6            | THR500 | ASP355 | 54          |              | 3            | GLN493 | GLU35  | 77          |    |
|              | 7            | LYS353 | GLN498 | 51          |              | 4            | GLN498 | ASP38  | 69          |    |
|              | 8            | LYS353 | GLY496 | 46          |              | 5            | THR500 | ASP355 | 51          |    |
|              | 9            | TYR505 | GLU37  | 43          |              | 6            | GLN498 | LYS353 | 46          |    |
| <b>G447A</b> | 1            | TYR449 | ASP38  | 92          |              | 7            | TYR505 | GLU37  | 41          |    |
|              | 2            | GLY502 | LYS353 | 81          |              | <b>A475V</b> | 1      | GLY502 | LYS353      | 84 |
|              | 3            | GLN493 | GLU35  | 68          |              |              | 2      | GLN493 | GLU35       | 83 |
|              | 4            | TYR505 | GLU37  | 57          | 3            |              | GLN498 | ASP38  | 70          |    |
|              | 5            | TYR83  | ASN487 | 53          | 4            |              | ASN487 | TYR83  | 68          |    |
|              | 6            | THR500 | ASP355 | 46          | 5            |              | THR500 | ASP355 | 64          |    |
|              | 7            | LYS353 | GLN498 | 42          | 6            |              | GLN498 | LYS353 | 42          |    |
| <b>Y449A</b> | 1            | GLY502 | LYS353 | 78          | <b>G476A</b> | 1            | GLY502 | LYS353 | 85          |    |
|              | 2            | GLN493 | GLU35  | 72          |              | 2            | TYR449 | ASP38  | 78          |    |
|              | 3            | THR500 | ASP355 | 69          |              | 3            | GLN493 | GLU35  | 77          |    |
|              | 4            | LYS417 | ASP30  | 66          |              | 4            | TYR505 | ALA386 | 75          |    |
|              | 5            | GLN493 | LYS31  | 56          |              | 5            | GLN498 | ASP38  | 73          |    |
|              | 6            | TYR489 | TYR83  | 47          |              | 6            | TYR83  | ASN487 | 70          |    |
|              | 7            | GLY496 | LYS353 | 41          |              | 7            | LYS353 | GLN498 | 41          |    |
|              | <b>Y453A</b> | 1      | GLY502 | LYS353      | 84           | <b>G476S</b> | 1      | GLN493 | GLU35       | 88 |
| 2            |              | ASN487 | TYR83  | 78          | 2            |              | TYR449 | ASP38  | 84          |    |
| 3            |              | GLN493 | GLU35  | 77          | 3            |              | GLY502 | LYS353 | 83          |    |
| 4            |              | TYR505 | GLU37  | 67          | 4            |              | ASN487 | TYR83  | 69          |    |
| 5            |              | THR500 | ASP355 | 56          | 5            |              | THR500 | TYR41  | 55          |    |
| 6            |              | TYR449 | ASP38  | 41          | 6            |              | TYR505 | GLU37  | 52          |    |
|              |              |        |        | 7           | GLN498       |              | ASP38  | 52     |             |    |
|              |              |        |        | 8           | GLY496       |              | LYS353 | 49     |             |    |
|              |              |        |        | 9           | GLN498       |              | LYS353 | 46     |             |    |

Table S3. (continued)

| mutant       | # | RBD    | ACE2   | Occupancy % | mutant       | #  | RBD    | ACE2   | Occupancy % |
|--------------|---|--------|--------|-------------|--------------|----|--------|--------|-------------|
| <b>T478I</b> | 1 | TYR449 | ASP38  | 95          | <b>N487A</b> | 1  | THR500 | ASP355 | 87          |
|              | 2 | GLY502 | LYS353 | 88          |              | 2  | GLY502 | LYS353 | 81          |
|              | 3 | GLN498 | ASP38  | 82          |              | 3  | ARG403 | GLU37  | 73          |
|              | 4 | GLN493 | GLU35  | 78          |              | 4  | GLN498 | LYS353 | 62          |
|              | 5 | ASN487 | TYR83  | 70          |              | 5  | GLN493 | GLU35  | 61          |
|              | 6 | TYR505 | GLU37  | 59          |              | 6  | GLU484 | LYS31  | 45          |
|              | 7 | Gly496 | LYS353 | 40          | <b>Y489A</b> | 1  | TYR449 | ASP38  | 89          |
|              | 8 | GLN498 | LYS353 | 47          |              | 2  | GLY502 | LYS353 | 87          |
|              | 9 | THR500 | ASP355 | 43          |              | 3  | GLN493 | GLU35  | 82          |
| <b>V483A</b> | 1 | TYR449 | ASP38  | 94          |              | 4  | THR500 | ASP355 | 65          |
|              | 2 | GLY502 | LYS353 | 89          |              | 5  | GLN498 | ASP38  | 80          |
|              | 3 | GLN498 | ASP38  | 88          |              | 6  | LYS417 | ASP30  | 54          |
|              | 4 | GLN493 | GLU35  | 79          |              | 7  | TYR505 | GLU37  | 54          |
|              | 5 | ASN487 | TYR83  | 74          |              | 8  | ASN487 | TYR83  | 43          |
|              | 6 | LYS417 | ASP30  | 57          |              | 9  | GLN498 | LYS353 | 40          |
|              | 7 | GLN498 | LYS353 | 53          |              | 10 | GLN493 | LYS31  | 67          |
|              | 8 | TYR505 | GLU37  | 44          |              | 11 | GLY496 | LYS353 | 42          |
|              | 9 | THR500 | TYR41  | 44          | <b>Q493A</b> | 1  | TYR449 | ASP38  | 95          |
| <b>V483F</b> | 1 | TYR449 | ASP38  | 92          |              | 2  | GLY502 | LYS353 | 87          |
|              | 2 | GLY502 | LYS353 | 84          |              | 3  | GLN498 | ASP38  | 80          |
|              | 3 | ASN487 | TYR83  | 74          |              | 4  | ASN487 | TYR83  | 78          |
|              | 4 | LYS417 | ASP30  | 65          |              | 5  | TYR505 | GLU37  | 61          |
|              | 5 | GLN498 | ASP38  | 58          |              | 6  | GLN498 | LYS353 | 50          |
|              | 6 | TYR505 | GLU37  | 53          |              | 7  | LYS417 | ASP30  | 49          |
|              | 7 | GLY496 | LYS353 | 51          |              | 8  | THR500 | TYR41  | 47          |
|              | 8 | THR500 | TYR41  | 44          |              | 9  | GLY496 | LYS353 | 43          |
|              | 9 | GLN498 | LYS353 | 42          | <b>S494A</b> | 1  | GLY502 | LYS353 | 88          |
| <b>E484A</b> | 1 | GLY502 | LYS353 | 85          |              | 2  | GLN498 | ASP38  | 87          |
|              | 2 | GLN493 | GLU35  | 83          |              | 3  | TYR83  | ASN487 | 82          |
|              | 3 | TYR83  | ASN487 | 72          |              | 4  | GLN493 | GLU35  | 73          |
|              | 4 | TYR505 | GLU37  | 68          |              | 5  | TYR505 | GLU37  | 67          |
|              | 5 | LYS417 | ASP30  | 47          |              | 6  | THR500 | ASP355 | 65          |
|              | 6 | THR500 | ASP355 | 46          |              | 7  | LYS417 | ASP30  | 65          |
| <b>F486A</b> | 1 | GLY502 | LYS353 | 82          | <b>S494P</b> | 1  | GLN493 | GLU35  | 91          |
|              | 2 | GLN493 | GLU35  | 78          |              | 2  | TYR449 | ASP38  | 85          |
|              | 3 | ASN487 | TYR83  | 78          |              | 3  | GLY502 | LYS353 | 85          |
|              | 4 | THR500 | ASP355 | 74          |              | 4  | ASN487 | TYR83  | 72          |
|              | 5 | TYR449 | ASP38  | 60          |              | 5  | THR500 | TYR41  | 47          |
|              | 6 | TYR505 | ALA386 | 56          |              | 6  | TYR505 | GLU37  | 50          |
|              | 7 | LYS417 | ASP30  | 44          |              | 7  | GLN498 | ASP38  | 52          |
|              | 8 | GLY496 | LYS353 | 41          |              | 8  | GLY496 | LYS353 | 43          |
|              |   |        |        |             |              | 9  | GLN498 | LYS353 | 48          |

**Table S3.** (continued)

| <b>mutant</b> | <b>#</b> | <b>RBD</b> | <b>ACE2</b> | <b>Occupancy %</b> |
|---------------|----------|------------|-------------|--------------------|
| <b>G496A</b>  | 1        | GLY502     | LYS353      | 86                 |
|               | 2        | GLN493     | GLU35       | 80                 |
|               | 3        | TYR83      | ASN487      | 72                 |
|               | 4        | THR500     | ASP355      | 59                 |
|               | 5        | TYR449     | ASP38       | 55                 |
|               | 6        | GLN498     | ASP38       | 44                 |
| <b>Q498A</b>  | 1        | TYR449     | ASP38       | 86                 |
|               | 2        | GLY502     | LYS353      | 84                 |
|               | 3        | ASN487     | TYR83       | 78                 |
|               | 4        | GLN493     | GLU35       | 68                 |
|               | 5        | LYS417     | ASP30       | 62                 |
|               | 6        | THR500     | ASP355      | 58                 |
|               | 7        | TYR453     | HIS34       | 55                 |
|               | 8        | TYR505     | GLU37       | 48                 |
| <b>T500A</b>  | 1        | GLY502     | LYS353      | 82                 |
|               | 2        | GLN493     | GLU35       | 75                 |
|               | 3        | TYR83      | ASN487      | 74                 |
|               | 4        | LYS353     | GLY496      | 70                 |
|               | 5        | GLN42      | GLN498      | 66                 |
|               | 6        | LYS353     | GLN498      | 61                 |
|               | 7        | LYS417     | ASP30       | 53                 |
|               | 8        | GLN498     | GLN42       | 48                 |
|               | 9        | TYR505     | GLU37       | 47                 |
| <b>N501A</b>  | 1        | TYR449     | ASP38       | 84                 |
|               | 2        | GLY502     | LYS353      | 80                 |
|               | 3        | GLN498     | ASP38       | 79                 |
|               | 4        | ASN487     | TYR83       | 77                 |
|               | 5        | GLN493     | GLU35       | 73                 |
|               | 6        | TYR505     | GLU37       | 63                 |
|               | 7        | LYS417     | ASP30       | 61                 |
|               | 8        | THR500     | ASP355      | 52                 |
|               | 9        | GLN498     | LYS353      | 44                 |
| <b>G502A</b>  | 1        | ASN487     | TYR83       | 77                 |
|               | 2        | GLN493     | GLU35       | 77                 |
|               | 3        | LYS417     | ASP30       | 61                 |
|               | 4        | TYR505     | GLU37       | 47                 |
| <b>Y505A</b>  | 1        | GLY502     | LYS353      | 88                 |
|               | 2        | ASN487     | TYR83       | 82                 |
|               | 3        | GLN493     | GLU35       | 78                 |
|               | 4        | GLN498     | ASP38       | 78                 |
|               | 5        | GLN498     | LYS353      | 68                 |
|               | 6        | THR500     | ASP355      | 67                 |
|               | 7        | GLN493     | LYS31       | 50                 |

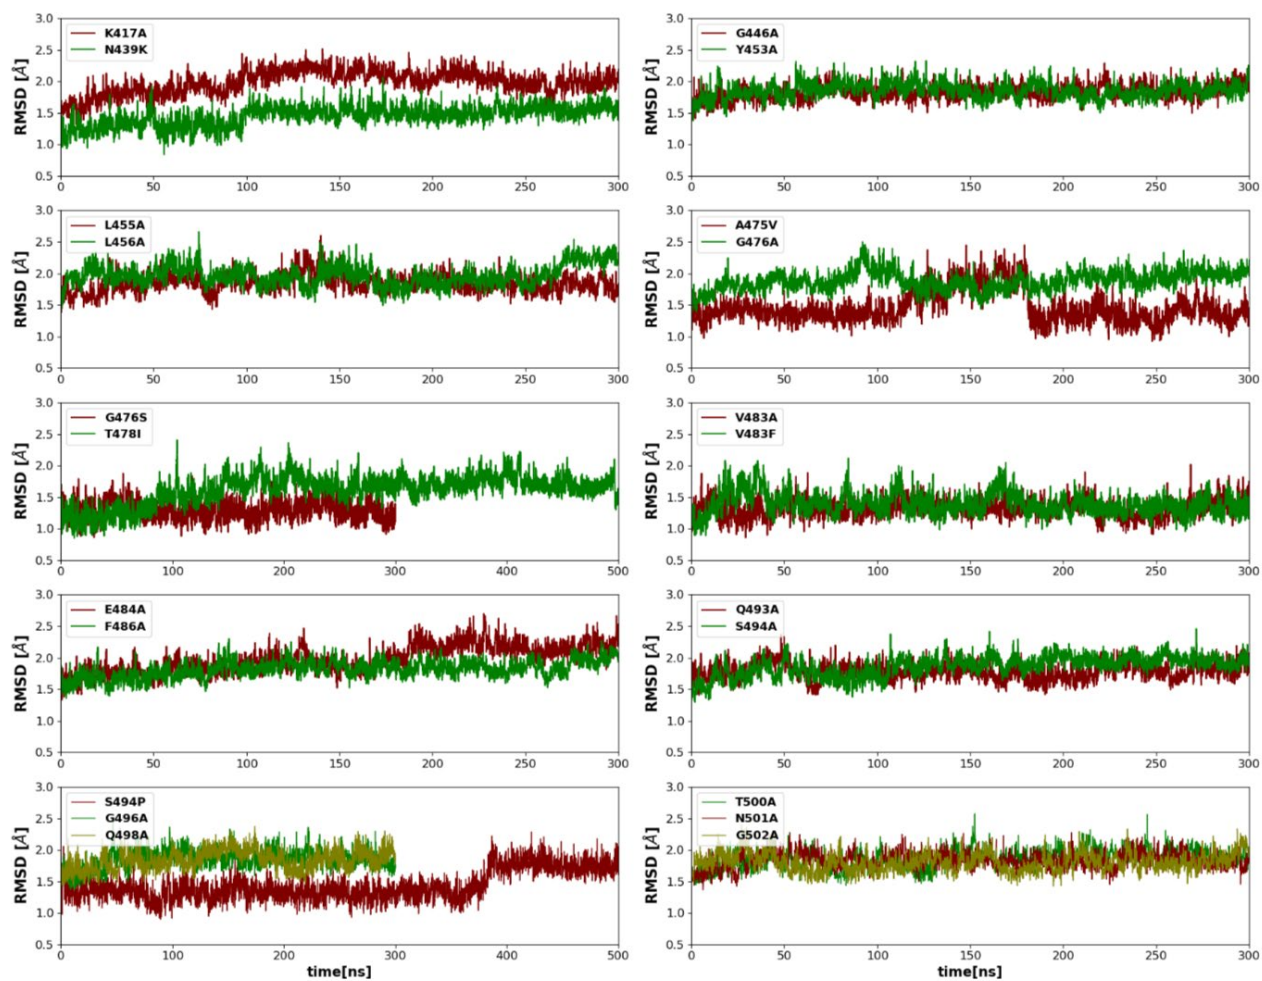

Figure S1. RMSD plots for mutations in nCoV-2019.

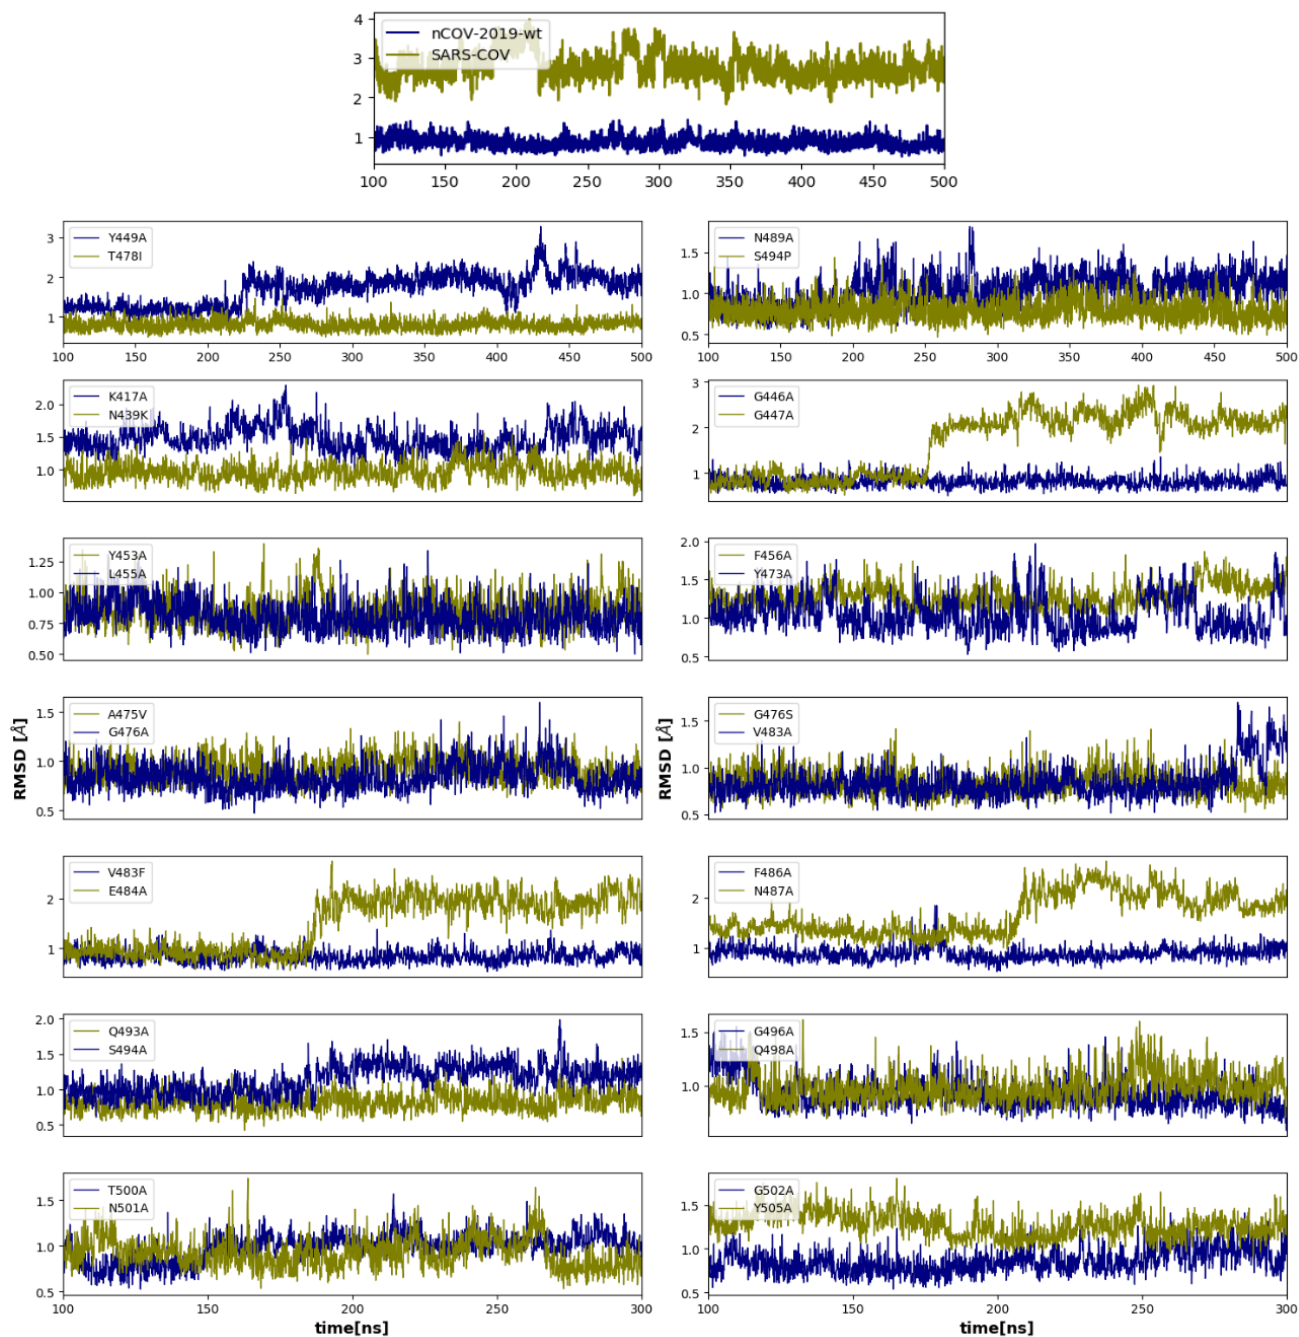

**Figure S2.** Loop RMSD for nCOV-2019, SARS-COV and all mutant systems.

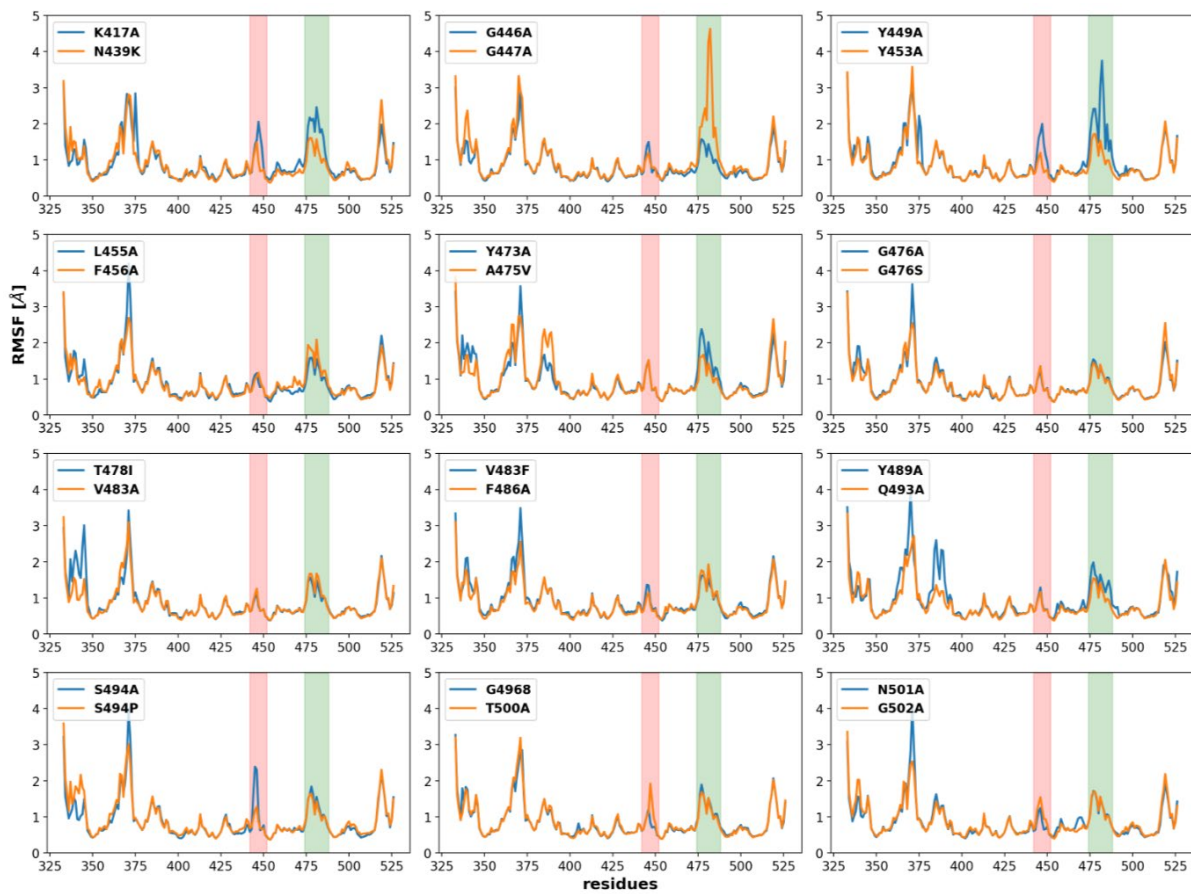

**Figure S3.** RMSF plots for mutations of nCOV-2019.



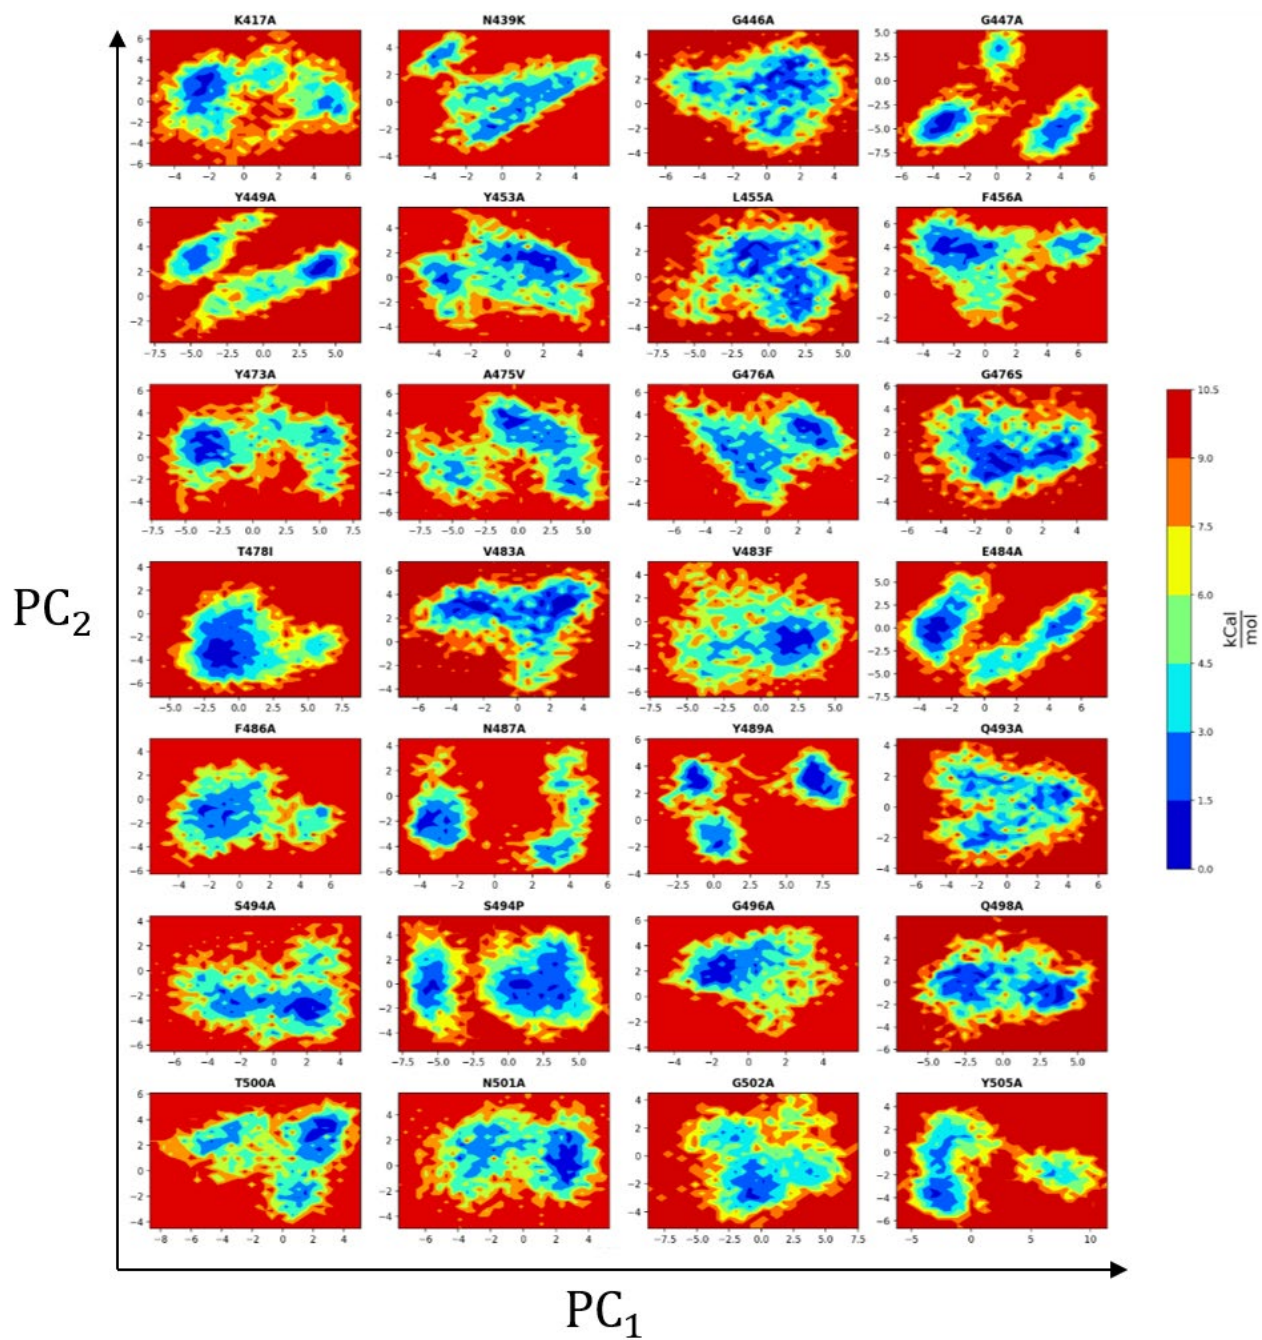

Figure S4. Free energy landscapes for mutants of nCoV-2019.

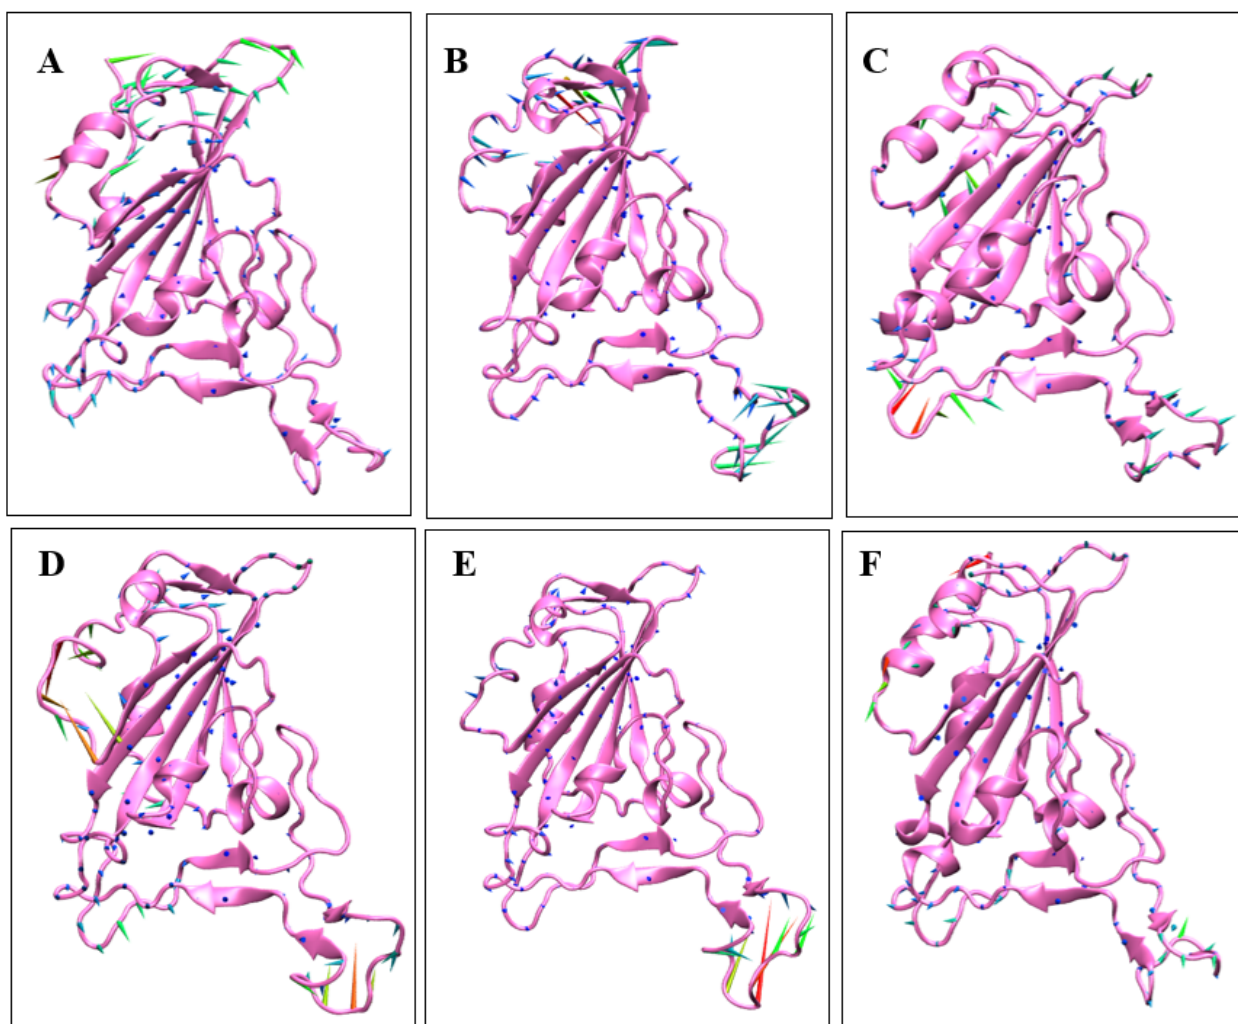

**Figure S5.** Porcupine plots for A) nCoV-2019 B) SARS-COV C) N487A D) Y449A E) G447A F) 18-Glu484. Arrows show the direction of movement for the  $C_{\alpha}$  atoms and length of arrows show the magnitude of the motion. longer arrows are red and shorter arrows are blue.

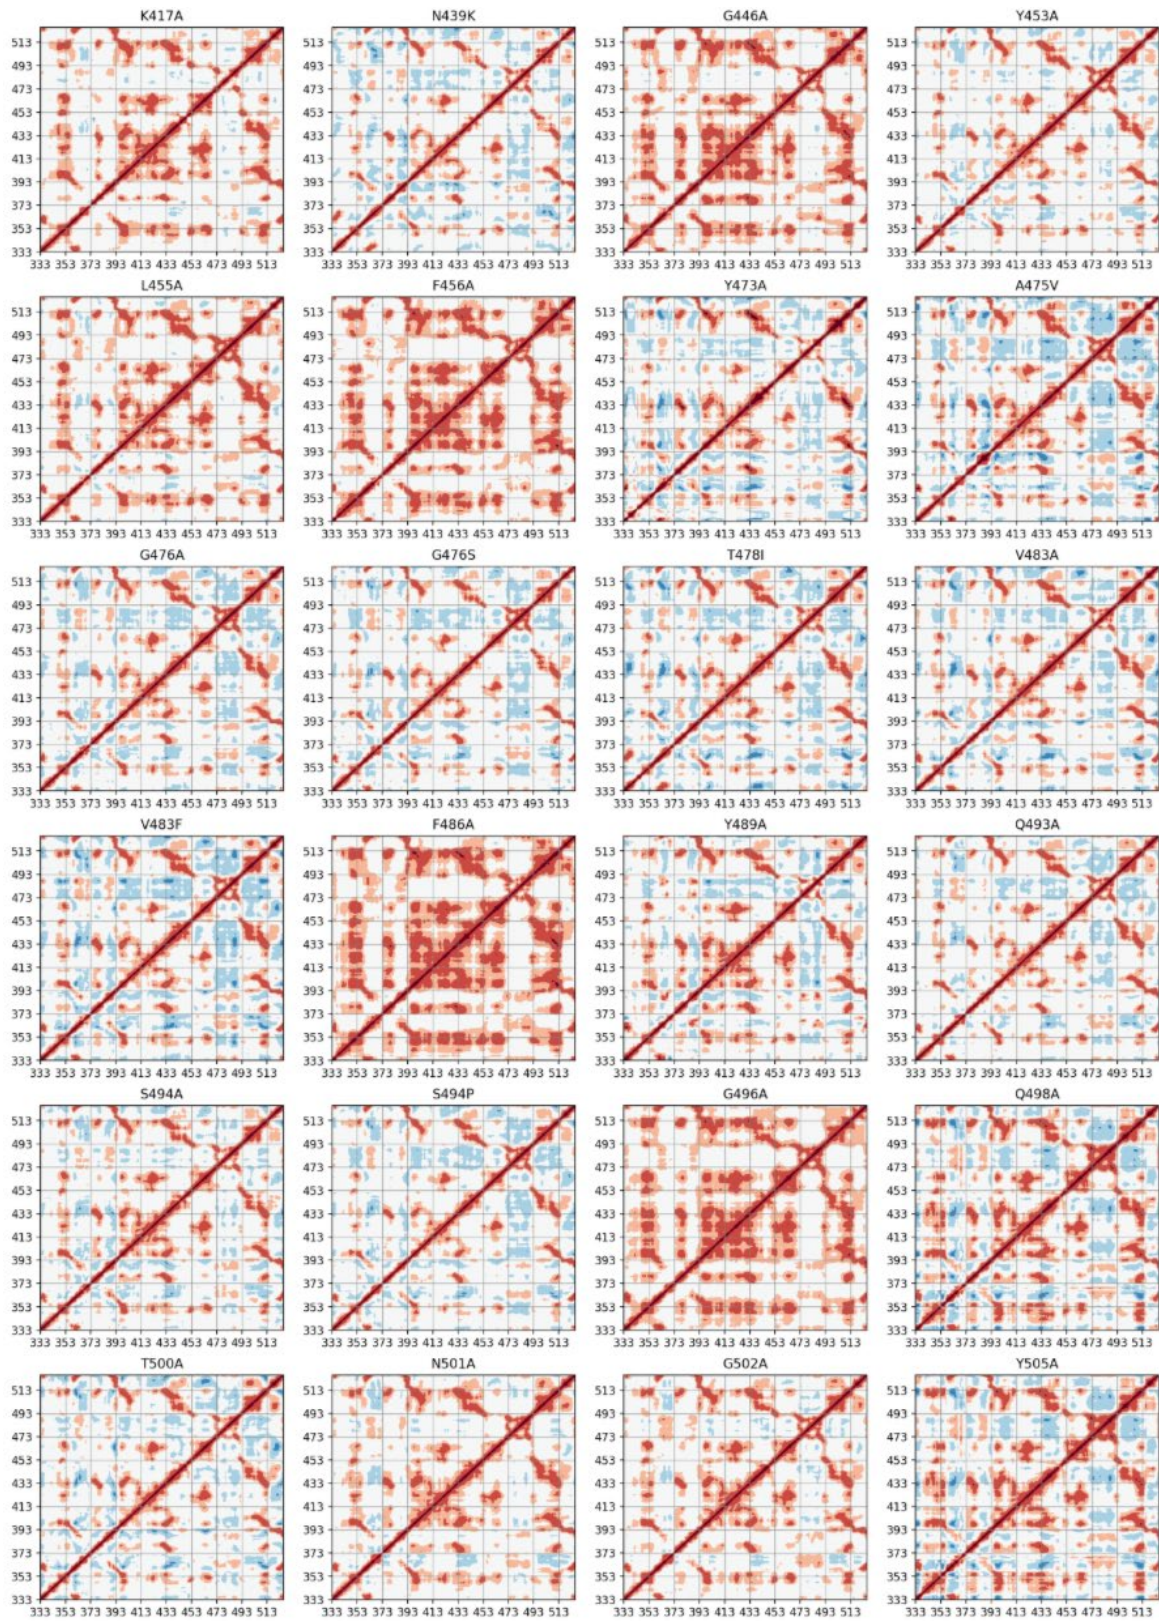

**Figure S6.** DCCM for mutants of nCoV-2019.

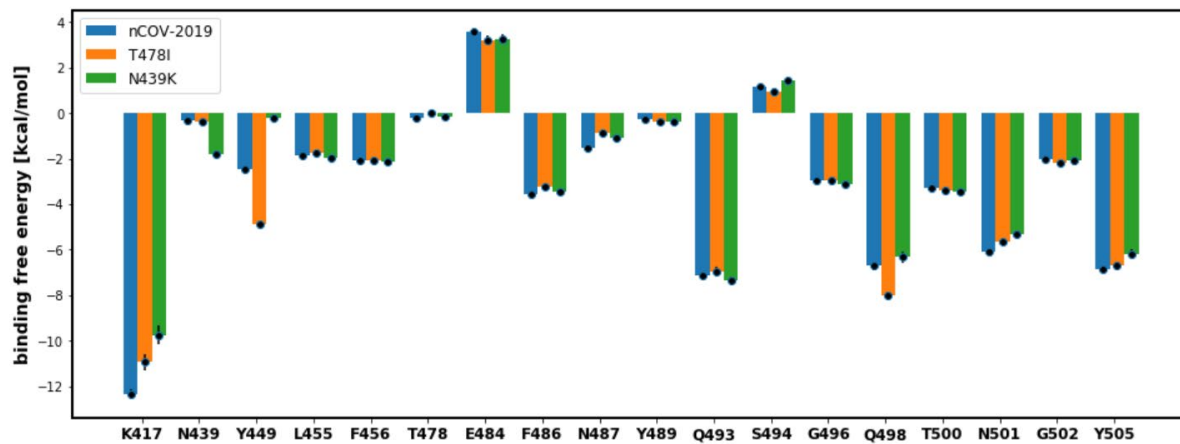

**Figure S7.** Binding energy decomposition for systems: nCOV-2019, T478I and N439K.
